# Supplementary material
Source: PubMed Central journal article supplement (PMC6062388)

## Supplementary Information

### QSAR Modeling for Predicting Reproductive Toxicity of Chemicals in Rat for Regulatory Purposes

Nikita Basant<sup>1</sup>, Shikha Gupta<sup>2</sup>, Kunwar P. Singh\*<sup>2</sup>

<sup>1</sup>ETRC, Gomtinagar, Lucknow- 226010, India

<sup>2</sup>Environmental Chemistry Division

CSIR-Indian Institute of Toxicology Research

Post Box 80, Mahatma Gandhi Marg, Lucknow-226 001, India

\*Author for all correspondance : kpsingh\_52@yahoo.com; kunwarpsingh@gmail.com

**Table S1:** Data set used in QSAR modeling

| S.No. | Chemical name                                                                                | CAS no.     | loael_dose |
|-------|----------------------------------------------------------------------------------------------|-------------|------------|
| 1     | (+)-Indoxacarb                                                                               | 144171-61-9 | 3.91       |
| 2     | 1,3-Dichloro-5,5-dimethylhydantoin                                                           | 118-52-5    | 1322.00    |
| 3     | 1,3-Propanediamine, N-(3-aminopropyl)-N-dodecyl-                                             | 2372-82-9   | 30.00      |
| 4     | 1,4-Dichlorobenzene                                                                          | 106-46-7    | 90.00      |
| 5     | 1,6-Hexanediamine                                                                            | 124-09-4    | 500.00     |
| 6     | 1H-1,2,4-Triazole-1-ethanol, .alpha.-(1-chlorocyclopropyl)-.alpha.-[(2-chlorophenyl)methyl]- | 120983-64-4 | 39.60      |
| 7     | 2-(Thiocyanomethylthio)benzothiazole                                                         | 21564-17-0  | 38.40      |
| 8     | 2,2-Dibromo-3-nitrilopropionamide                                                            | 10222-01-2  | 15.00      |
| 9     | 2,4-Dichlorophenol                                                                           | 120-83-2    | 543.00     |
| 10    | 2,4-Dichlorophenoxyacetic acid                                                               | 94-75-7     | 20.00      |
| 11    | 2-Methyl-4-chlorophenoxyacetic acid                                                          | 94-74-6     | 22.50      |
| 12    | 2-Phenylphenol                                                                               | 90-43-7     | 140.00     |
| 13    | 3-(3-Chloro-p-tolyl)-1,1-dimethylurea                                                        | 15545-48-9  | 50.00      |
| 14    | 3-(Dichloroacetyl)-5-(2-furanyl)-2,2-dimethyloxazolidine                                     | 121776-33-8 | 92.39      |
| 15    | 3-Iodo-2-propynyl-N-butylcarbamate                                                           | 55406-53-6  | 37.50      |
| 16    | 4-(2,4-Dichlorophenoxy)butyric acid                                                          | 94-82-6     | 112.00     |
| 17    | 4-(2-Nitrobutyl)morpholine                                                                   | 2224-44-4   | 20.00      |

|    |                                          |             |        |
|----|------------------------------------------|-------------|--------|
| 18 | 4,5-Dichloro-2-octyl-3(2H)-isothiazolone | 64359-81-5  | 20.00  |
| 19 | 4-Nitrotoluene                           | 99-99-0     | 160.00 |
| 20 | 5-Chloro-2-methyl-3(2H)-isothiazolone    | 26172-55-4  | 8.50   |
| 21 | Abamectin                                | 71751-41-2  | 0.40   |
| 22 | Acephate                                 | 30560-19-1  | 25.00  |
| 23 | Acequinocyl                              | 57960-19-7  | 65.50  |
| 24 | Acetamiprid                              | 135410-20-7 | 51.00  |
| 25 | Acetochlor                               | 34256-82-1  | 29.90  |
| 26 | Acibenzolar-S-methyl                     | 135158-54-2 | 100.00 |
| 27 | Acrolein                                 | 107-02-8    | 3.00   |
| 28 | Alachlor                                 | 15972-60-8  | 30.00  |
| 29 | Aldicarb                                 | 116-06-3    | 0.90   |
| 30 | Ametryn                                  | 834-12-8    | 131.00 |
| 31 | Amitraz                                  | 33089-61-1  | 4.36   |
| 32 | Asulam                                   | 3337-71-1   | 250.00 |
| 33 | Atrazine                                 | 1912-24-9   | 39.00  |
| 34 | Azafenidin                               | 68049-83-2  | 10.10  |
| 35 | Azamethiphos                             | 35575-96-3  | 10.00  |
| 36 | Azoxystrobin                             | 131860-33-8 | 165.40 |
| 37 | Bendiocarb                               | 22781-23-3  | 12.50  |
| 38 | Benfluralin                              | 1861-40-1   | 68.10  |
| 39 | Benomyl                                  | 17804-35-2  | 25.00  |
| 40 | Benoxacor                                | 98730-04-2  | 34.84  |
| 41 | Bensulide                                | 741-58-2    | 86.50  |
| 42 | Bentazone                                | 25057-89-0  | 62.00  |
| 43 | Benzophenone                             | 119-61-9    | 8.78   |
| 44 | Bethoxazin                               | 163269-30-5 | 70.00  |
| 45 | Bifenazate                               | 149877-41-8 | 6.90   |
| 46 | Bifenthrin                               | 82657-04-3  | 5.00   |
| 47 | Bis(tributyltin)oxide                    | 56-35-9     | 2.95   |
| 48 | Bitertanol                               | 55179-31-2  | 5.00   |
| 49 | Boscalid                                 | 188425-85-6 | 123.90 |
| 50 | Bromacil                                 | 314-40-9    | 125.00 |
| 51 | Bromuconazole                            | 116255-48-2 | 141.20 |
| 52 | Bronopol                                 | 52-51-7     | 50.00  |
| 53 | Buprofezin                               | 69327-76-0  | 81.47  |
| 54 | Butachlor                                | 23184-66-9  | 50.00  |
| 55 | Butafenacil                              | 134605-64-4 | 23.80  |
| 56 | Butyl benzyl phthalate                   | 85-68-7     | 100.00 |
| 57 | Butylate                                 | 2008-41-5   | 50.00  |
| 58 | Butylbenzene                             | 104-51-8    | 100.00 |

|    |                           |             |         |
|----|---------------------------|-------------|---------|
| 59 | Captafol                  | 01-06-2425  | 60.00   |
| 60 | Captan                    | 133-06-2    | 25.00   |
| 61 | Carbaryl                  | 63-25-2     | 31.34   |
| 62 | Carbendazim               | 10605-21-7  | 250.00  |
| 63 | Carbofuran                | 1563-66-2   | 5.00    |
| 64 | Carbophenothion           | 786-19-6    | 0.50    |
| 65 | Carboxin                  | 5234-68-4   | 10.00   |
| 66 | Carfentrazone-ethyl       | 128639-02-1 | 343.00  |
| 67 | Chlorethoxyfos            | 54593-83-8  | 0.78    |
| 68 | Chlorfenapyr              | 122453-73-0 | 22.00   |
| 69 | Chlorothalonil            | 1897-45-6   | 30.80   |
| 70 | Chlorpropham              | 101-21-3    | 150.00  |
| 71 | Chlorpyrifos-methyl       | 5598-13-0   | 3.00    |
| 72 | Chlorsulfuron             | 64902-72-3  | 541.00  |
| 73 | Chlorthal-dimethyl        | 1861-32-1   | 233.00  |
| 74 | Clethodim                 | 99129-21-2  | 263.00  |
| 75 | Clodinafop-propargyl      | 105512-06-9 | 31.69   |
| 76 | Clofencet                 | 82697-71-0  | 393.00  |
| 77 | Clofentezine              | 74115-24-5  | 20.00   |
| 78 | Clomazone                 | 81777-89-1  | 100.00  |
| 79 | Cloprop                   | 101-10-0    | 250.00  |
| 80 | Clopyralid                | 1702-17-6   | 1500.00 |
| 81 | Cloquintocet-mexyl        | 99607-70-2  | 721.65  |
| 82 | Cloransulam-methyl        | 147150-35-4 | 100.00  |
| 83 | Clothianidin              | 210880-92-5 | 31.20   |
| 84 | Copper-8-hydroxyquinoline | 10380-28-6  | 196.00  |
| 85 | Coumaphos                 | 56-72-4     | 0.30    |
| 86 | Cumyluron                 | 99485-76-4  | 297.40  |
| 87 | Cyanamide                 | 420-04-2    | 1.25    |
| 88 | Cyanazine                 | 21725-46-2  | 1.43    |
| 89 | Cyclanilide               | 113136-77-9 | 2.00    |
| 90 | Cycloate                  | 1134-23-2   | 20.00   |
| 91 | Cyfluthrin                | 68359-37-5  | 9.00    |
| 92 | Cyhalofop-butyl           | 122008-85-9 | 51.10   |
| 93 | Cyhalothrin               | 68085-85-8  | 5.00    |
| 94 | Cyhexatin                 | 13121-70-5  | 2.40    |
| 95 | Cymoxanil                 | 57966-95-7  | 32.10   |
| 96 | Cypermethrin              | 52315-07-8  | 27.60   |
| 97 | Cyproconazole             | 94361-06-5  | 8.29    |
| 98 | Cyprodinil                | 121552-61-2 | 326.40  |
| 99 | Cyromazine                | 66215-27-8  | 50.00   |

|     |                                     |             |         |
|-----|-------------------------------------|-------------|---------|
| 100 | Daminozide                          | 1596-84-5   | 500.00  |
| 101 | Dazomet                             | 533-74-4    | 2.78    |
| 102 | Deltamethrin                        | 52918-63-5  | 21.20   |
| 103 | Desmedipham                         | 13684-56-5  | 20.00   |
| 104 | Diazinon                            | 333-41-5    | 6.69    |
| 105 | Dicamba                             | 1918-00-9   | 122.00  |
| 106 | Dichlobenil                         | 1194-65-6   | 17.50   |
| 107 | Dichlorprop                         | 120-36-5    | 25.00   |
| 108 | Dichlorvos                          | 62-73-7     | 7.20    |
| 109 | Diclofop-methyl                     | 51338-27-3  | 2.10    |
| 110 | Dicloran                            | 99-30-9     | 87.00   |
| 111 | Dicofol                             | 115-32-2    | 1.90    |
| 112 | Dicrotophos                         | 141-66-2    | 0.49    |
| 113 | Dicyclohexyl phthalate              | 84-61-7     | 17.84   |
| 114 | Diethyl phthalate                   | 84-66-2     | 197.00  |
| 115 | Difenoconazole                      | 119446-68-3 | 12.50   |
| 116 | Diflubenzuron                       | 35367-38-5  | 36.00   |
| 117 | Diflufenzopyr                       | 109293-97-2 | 113.10  |
| 118 | Dimethenamid                        | 87674-68-8  | 150.00  |
| 119 | Dimethipin                          | 55290-64-7  | 40.00   |
| 120 | Dimethoate                          | 60-51-5     | 1.00    |
| 121 | Dimethomorph                        | 110488-70-5 | 50.00   |
| 122 | Dimethylarsinic acid                | 75-60-5     | 17.86   |
| 123 | Dinotefuran                         | 165252-70-0 | 822.10  |
| 124 | Diphenylamine                       | 122-39-4    | 40.00   |
| 125 | Dipropyl pyridine-2,5-dicarboxylate | 136-45-8    | 289.40  |
| 126 | Disulfoton                          | 298-04-4    | 0.12    |
| 127 | Dithiopyr                           | 97886-45-8  | 16.40   |
| 128 | Diuron                              | 330-54-1    | 101.00  |
| 129 | Endosulfan                          | 115-29-7    | 6.18    |
| 130 | Epoxiconazole                       | 106325-08-0 | 22.12   |
| 131 | Esfenvalerate                       | 66230-04-4  | 5.10    |
| 132 | Ethalfuralin                        | 55283-68-6  | 37.50   |
| 133 | Ethametsulfuron methyl              | 97780-06-8  | 1582.00 |
| 134 | Ethephon                            | 16672-87-0  | 198.10  |
| 135 | Ethoprop                            | 13194-48-4  | 13.00   |
| 136 | Etofenprox                          | 80844-07-1  | 35.00   |
| 137 | Etoxazole                           | 153233-91-1 | 100.00  |
| 138 | Etridiazole                         | 2593-15-9   | 32.00   |
| 139 | Famoxadone                          | 131807-57-3 | 44.70   |
| 140 | Fenamidone                          | 161326-34-7 | 89.20   |

|     |                     |             |        |
|-----|---------------------|-------------|--------|
| 141 | Fenamiphos          | 22224-92-6  | 0.65   |
| 142 | Fenarimol           | 60168-88-9  | 1.20   |
| 143 | Fenbuconazole       | 114369-43-6 | 40.00  |
| 144 | Fenbutatin Oxide    | 13356-08-6  | 17.40  |
| 145 | Fenhexamid          | 126833-17-8 | 406.00 |
| 146 | Fenitrothion        | 122-14-5    | 0.68   |
| 147 | Fenoxaprop-ethyl    | 66441-23-4  | 0.25   |
| 148 | Fenoxycarb          | 72490-01-8  | 16.00  |
| 149 | Fenpropathrin       | 39515-41-8  | 8.90   |
| 150 | Fenpyroximate (Z,E) | 111812-58-9 | 6.59   |
| 151 | Fenthion            | 55-38-9     | 0.70   |
| 152 | Fipronil            | 120068-37-3 | 2.54   |
| 153 | Florasulam          | 145701-23-1 | 500.00 |
| 154 | Fluazifop-butyl     | 69806-50-4  | 5.80   |
| 155 | Fluazinam           | 79622-59-6  | 9.70   |
| 156 | Flucycloxuron       | 113036-88-7 | 374.50 |
| 157 | Fludioxonil         | 131341-86-1 | 221.61 |
| 158 | Flufenacet          | 142459-58-3 | 7.30   |
| 159 | Flufenpyr-ethyl     | 188489-07-8 | 16.00  |
| 160 | Flumiclorac-pentyl  | 87546-18-7  | 829.00 |
| 161 | Flumioxazin         | 103361-09-7 | 12.70  |
| 162 | Fluometuron         | 2164-17-2   | 15.00  |
| 163 | Fluopicolide        | 239110-15-7 | 144.60 |
| 164 | Fluoxastrobin       | 361377-29-9 | 665.00 |
| 165 | Fluroxypyr          | 69377-81-7  | 500.00 |
| 166 | Flusilazole         | 85509-19-9  | 0.85   |
| 167 | Fluthiacet-methyl   | 117337-19-6 | 31.80  |
| 168 | Fluvalinate         | 69409-94-5  | 5.00   |
| 169 | Folpet              | 133-07-3    | 180.00 |
| 170 | Forchlorfenuron     | 68157-60-8  | 144.00 |
| 171 | Fosthiazate         | 98886-44-3  | 2.09   |
| 172 | Glutaraldehyde      | 111-30-8    | 19.50  |
| 173 | Glyphosate          | 1071-83-6   | 30.00  |
| 174 | Halosulfuron-methyl | 100784-20-1 | 223.20 |
| 175 | Hexachlorobenzene   | 118-74-1    | 4.00   |
| 176 | Hexaconazole        | 79983-71-4  | 50.00  |
| 177 | Hexazinone          | 51235-04-2  | 143.00 |
| 178 | Hexythiazox         | 78587-05-0  | 180.67 |
| 179 | Hydramethylnon      | 67485-29-4  | 3.32   |
| 180 | Imazalil            | 35554-44-0  | 80.00  |
| 181 | Imidacloprid        | 138261-41-3 | 47.30  |

|     |                               |             |         |
|-----|-------------------------------|-------------|---------|
| 182 | Imiprothrin                   | 72963-72-5  | 143.50  |
| 183 | Iprodione                     | 36734-19-7  | 54.70   |
| 184 | Isazofos                      | 42509-80-8  | 6.25    |
| 185 | Isofenphos                    | 25311-71-1  | 0.44    |
| 186 | Isoxaben                      | 82558-50-7  | 200.00  |
| 187 | Isoxadifen-ethyl              | 163520-33-0 | 249.80  |
| 188 | Isoxaflutole                  | 141112-29-0 | 17.40   |
| 189 | Kasugamycin                   | 6980-18-3   | 70.30   |
| 190 | Kresoxim-methyl               | 143390-89-0 | 362.70  |
| 191 | Lactofen                      | 77501-63-4  | 26.20   |
| 192 | lambda-Cyhalothrin            | 91465-08-6  | 5.00    |
| 193 | Lindane                       | 58-89-9     | 1.71    |
| 194 | Linuron                       | 330-55-2    | 5.83    |
| 195 | Malathion                     | 121-75-5    | 394.00  |
| 196 | Mecoprop                      | 93-65-2     | 50.00   |
| 197 | Mefenpyr-diethyl              | 135590-91-9 | 250.00  |
| 198 | Mesotrione                    | 104206-82-8 | 0.30    |
| 199 | Metaflumizone                 | 139968-49-3 | 50.00   |
| 200 | Metalaxyl                     | 57837-19-1  | 62.50   |
| 201 | Metaldehyde                   | 108-62-3    | 133.53  |
| 202 | Metasystox R                  | 301-12-2    | 2.10    |
| 203 | Metconazole                   | 125116-23-6 | 32.00   |
| 204 | Methamidophos                 | 10265-92-6  | 0.08    |
| 205 | Methidathion                  | 950-37-8    | 1.25    |
| 206 | Methomyl                      | 16752-77-5  | 36.90   |
| 207 | Methoxyfenozide               | 161050-58-4 | 1551.90 |
| 208 | Methyl isothiocyanate         | 556-61-6    | 3.40    |
| 209 | Methyl parathion              | 298-00-0    | 2.00    |
| 210 | Methyl salicylate             | 119-36-8    | 150.00  |
| 211 | Methylene bis(thiocyanate)    | 6317-18-6   | 2.50    |
| 212 | Metobenzuron                  | 111578-32-6 | 18.75   |
| 213 | Metolachlor                   | 51218-45-2  | 76.60   |
| 214 | Metribuzin                    | 21087-64-9  | 7.50    |
| 215 | Metsulfuron-methyl            | 74223-64-6  | 250.00  |
| 216 | Mevinphos                     | 7786-34-7   | 0.50    |
| 217 | MGK-264                       | 113-48-4    | 61.00   |
| 218 | Molinate                      | 2212-67-1   | 0.80    |
| 219 | Myclobutanil                  | 88671-89-0  | 10.00   |
| 220 | N,N-Diethyl-3-methylbenzamide | 134-62-3    | 25.00   |
| 221 | Naled                         | 300-76-5    | 18.00   |
| 222 | Napropamide                   | 15299-99-7  | 100.00  |

|     |                          |             |         |
|-----|--------------------------|-------------|---------|
| 223 | Neodecanamide, N-methyl- | 105726-67-8 | 25.10   |
| 224 | Nitrapyrin               | 1929-82-4   | 20.00   |
| 225 | Nonylphenol              | 25154-52-3  | 15.00   |
| 226 | Norflurazon              | 27314-13-2  | 50.80   |
| 227 | Novaluron                | 116714-46-6 | 74.00   |
| 228 | Orthosulfamuron          | 213464-77-8 | 635.00  |
| 229 | Oryzalin                 | 19044-88-3  | 19.40   |
| 230 | Oxamyl                   | 23135-22-0  | 5.20    |
| 231 | Oxasulfuron              | 144651-06-9 | 377.00  |
| 232 | Oxyfluorfen              | 42874-03-3  | 120.00  |
| 233 | Paclobutrazol            | 76738-62-0  | 12.50   |
| 234 | Parathion                | 56-38-2     | 1.00    |
| 235 | Pendimethalin            | 40487-42-1  | 173.00  |
| 236 | Penoxsulam               | 219714-96-2 | 100.00  |
| 237 | Pentachloronitrobenzene  | 82-68-8     | 100.00  |
| 238 | Permethrin               | 52645-53-1  | 125.00  |
| 239 | Phenmedipham             | 13684-63-4  | 50.00   |
| 240 | Phorate                  | 298-02-2    | 0.36    |
| 241 | Phosalone                | 2310-17-0   | 29.40   |
| 242 | Picloram                 | 01-02-1918  | 1000.00 |
| 243 | Picolinafen              | 137641-05-5 | 19.00   |
| 244 | Pinoxaden                | 243973-20-8 | 500.00  |
| 245 | Piperonyl butoxide       | 51-03-6     | 469.00  |
| 246 | Pirimicarb               | 23103-98-2  | 88.00   |
| 247 | Polihexanide             | 32289-58-0  | 238.90  |
| 248 | Prallethrin              | 23031-36-9  | 156.00  |
| 249 | Primisulfuron-methyl     | 86209-51-0  | 250.00  |
| 250 | Prochloraz               | 67747-09-5  | 31.25   |
| 251 | Procymidone              | 32809-16-8  | 12.50   |
| 252 | Profenofos               | 41198-08-7  | 29.00   |
| 253 | Prometon                 | 1610-18-0   | 35.08   |
| 254 | Prometryn                | 7287-19-6   | 47.80   |
| 255 | Propachlor               | 1918-16-7   | 69.60   |
| 256 | Propanil                 | 709-98-8    | 43.00   |
| 257 | Propargite               | 2312-35-8   | 20.00   |
| 258 | Propazine                | 139-40-2    | 50.00   |
| 259 | Propetamphos             | 31218-83-4  | 5.50    |
| 260 | Propiconazole            | 60207-90-1  | 42.00   |
| 261 | Propyzamide              | 23950-58-5  | 114.00  |
| 262 | Prosulfuron              | 94125-34-5  | 136.00  |
| 263 | Prothioconazole          | 178928-70-6 | 750.00  |

|     |                               |             |         |
|-----|-------------------------------|-------------|---------|
| 264 | Pymetrozine                   | 123312-89-0 | 10.00   |
| 265 | Pyraclostrobin                | 175013-18-0 | 20.50   |
| 266 | Pyraflufen-ethyl              | 129630-19-9 | 721.00  |
| 267 | Pyrasulfotole                 | 365400-11-9 | 2.50    |
| 268 | Pyridaben                     | 96489-71-3  | 6.31    |
| 269 | Pyridalyl                     | 179101-81-6 | 68.70   |
| 270 | Pyrimethanil                  | 53112-28-0  | 294.00  |
| 271 | Pyriproxyfen                  | 95737-68-1  | 453.00  |
| 272 | Quinclorac                    | 84087-01-4  | 480.00  |
| 273 | Quinoxifen                    | 124495-18-7 | 100.00  |
| 274 | Quizalofop-ethyl              | 76578-14-8  | 1.25    |
| 275 | Resmethrin                    | 10453-86-8  | 25.00   |
| 276 | Rimsulfuron                   | 122931-48-0 | 830.00  |
| 277 | Rotenone                      | 83-79-4     | 3.00    |
| 278 | S-Bioallethrin                | 28434-00-6  | 150.00  |
| 279 | Sethoxydim                    | 74051-80-2  | 150.00  |
| 280 | S-Ethyl dipropylthiocarbamate | 759-94-4    | 10.00   |
| 281 | Simazine                      | 122-34-9    | 5.61    |
| 282 | Spinetoram (major component)  | 187166-40-1 | 74.84   |
| 283 | Spiromesifen                  | 283594-90-1 | 13.20   |
| 284 | Spirotetramat                 | 203313-25-1 | 419.30  |
| 285 | Spiroxamine                   | 118134-30-8 | 11.90   |
| 286 | Sulfentrazone                 | 122836-35-5 | 33.00   |
| 287 | Sulfluramid                   | 4151-50-2   | 1.34    |
| 288 | Sulfosulfuron                 | 141776-32-1 | 1312.80 |
| 289 | Tebufenozide                  | 112410-23-8 | 11.50   |
| 290 | Tebufenpyrad                  | 119168-77-3 | 16.80   |
| 291 | Tebupirimfos                  | 96182-53-5  | 1.25    |
| 292 | Tebuthiuron                   | 34014-18-1  | 31.00   |
| 293 | Tefluthrin                    | 79538-32-2  | 2.50    |
| 294 | Tembotrione                   | 335104-84-2 | 1.30    |
| 295 | Temephos                      | 3383-96-8   | 25.00   |
| 296 | Tepraloxydim                  | 149979-41-9 | 253.10  |
| 297 | Terbufos                      | 13071-79-9  | 0.18    |
| 298 | Tetraconazole                 | 112281-77-3 | 6.00    |
| 299 | Tetramethrin                  | 7696-12-0   | 150.00  |
| 300 | Thiabendazole                 | 148-79-8    | 28.10   |
| 301 | Thiacloprid                   | 111988-49-9 | 21.00   |
| 302 | Thiamethoxam                  | 153719-23-4 | 1.84    |
| 303 | Thiazopyr                     | 117718-60-2 | 5.00    |
| 304 | Thidiazuron                   | 51707-55-2  | 108.50  |



|     |                        |             |         |
|-----|------------------------|-------------|---------|
| 305 | Thiobencarb            | 28249-77-6  | 2.00    |
| 306 | Thiodicarb             | 59669-26-0  | 5.00    |
| 307 | Thiophanate-methyl     | 23564-05-8  | 13.70   |
| 308 | Thiram                 | 137-26-8    | 4.70    |
| 309 | Tolyfluanid            | 731-27-1    | 57.50   |
| 310 | Topramezone            | 210631-68-8 | 4.20    |
| 311 | Tralkoxydim            | 87820-88-0  | 100.00  |
| 312 | Tralomethrin           | 66841-25-6  | 0.75    |
| 313 | Triadimefon            | 43121-43-3  | 90.00   |
| 314 | Triadimenol            | 55219-65-3  | 25.00   |
| 315 | Tri-allate             | 2303-17-5   | 30.00   |
| 316 | Triasulfuron           | 82097-50-5  | 250.00  |
| 317 | Triazamate             | 112143-82-5 | 101.40  |
| 318 | Tribenuron-methyl      | 101200-48-0 | 19.00   |
| 319 | Tribufos               | 78-48-8     | 15.00   |
| 320 | Tributyltin chloride   | 1461-22-9   | 0.25    |
| 321 | Trichlorfon            | 52-68-6     | 175.00  |
| 322 | Triclopyr              | 55335-06-3  | 25.00   |
| 323 | Triclosan              | 3380-34-5   | 150.00  |
| 324 | Trifloxystrobin        | 141517-21-7 | 55.30   |
| 325 | Triflumizole           | 68694-11-1  | 1.50    |
| 326 | Trifluralin            | 1582-09-8   | 47.00   |
| 327 | Triflusulfuron-methyl  | 126535-15-7 | 44.00   |
| 328 | Triforine              | 26644-46-2  | 226.00  |
| 329 | Trinexapac-ethyl       | 95266-40-3  | 593.50  |
| 330 | Triphenyltin hydroxide | 76-87-9     | 1.40    |
| 331 | Triticonazole          | 131983-72-7 | 250.00  |
| 332 | Uniconazole-P          | 83657-17-4  | 75.00   |
| 333 | Vinclozolin            | 50471-44-8  | 4.90    |
| 334 | Zoxamide               | 156052-68-5 | 1624.40 |

---

**Table S2:** Out of AD compounds in QSAR models by leverage approach

| S.No                           | Model       | Data set | Chemical name                | Chemical structure                                                                   |
|--------------------------------|-------------|----------|------------------------------|--------------------------------------------------------------------------------------|
| <b>High Leverage Compounds</b> |             |          |                              |                                                                                      |
| 1.                             | DTF,<br>DTB | Training | Abamectin                    | 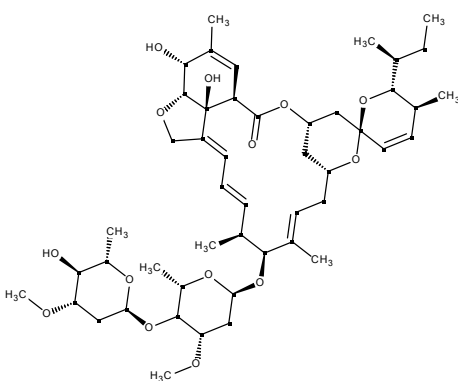   |
| 2                              | DTF,<br>DTB | Training | Kasugamycin                  |   |
| 3                              | DTF,<br>DTB | Training | Spinetoram (major component) |  |

---

4 DTB Training Temephos

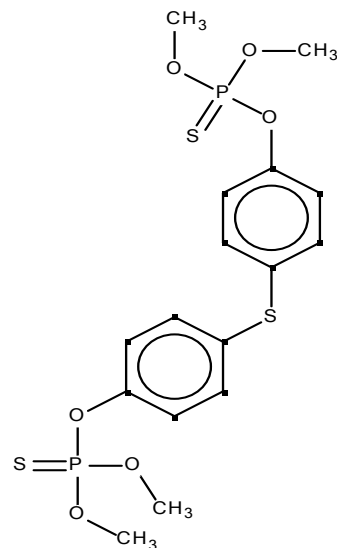

**High Standardized Residual Compounds**

1. DTF Training Abamectin

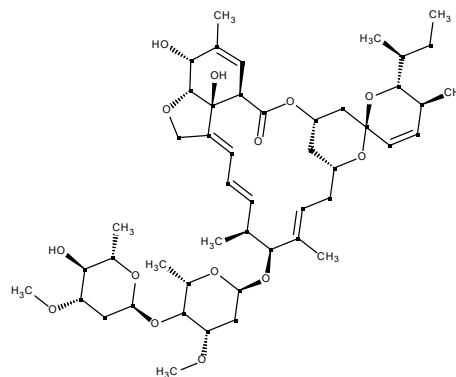

---

**Table S3:** Out of AD compounds in QSAR models by standardization approach

| S.No | Model    | Data set | Chemical name | Chemical structure                                                                   |
|------|----------|----------|---------------|--------------------------------------------------------------------------------------|
| 1.   | DTF, DTB | Training | Abamectin     | 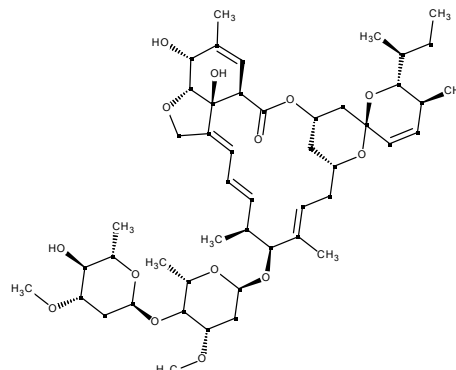 |

---

|   |             |          |                           |                                                                                                                                                                                                                                                                                                                                                                                                                                                                                                                                                                                                                            |
|---|-------------|----------|---------------------------|----------------------------------------------------------------------------------------------------------------------------------------------------------------------------------------------------------------------------------------------------------------------------------------------------------------------------------------------------------------------------------------------------------------------------------------------------------------------------------------------------------------------------------------------------------------------------------------------------------------------------|
| 2 | DTF,<br>DTB | Training | Ethametsulfuron<br>methyl | 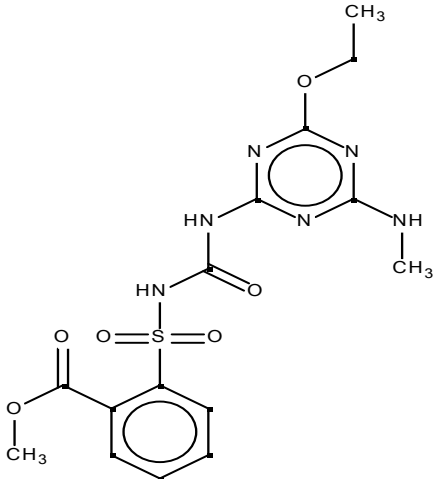 <p>The structure shows a central benzene ring with a methoxy group (-OCH<sub>3</sub>) at the 4-position and a sulfonamide group (-SO<sub>2</sub>NH-) at the 1-position. The sulfonamide nitrogen is connected to another nitrogen atom, which is part of a pyrimidine ring. The pyrimidine ring has a methoxy group (-OCH<sub>3</sub>) at the 6-position and a methylamino group (-NHCH<sub>3</sub>) at the 4-position.</p>                                                                                                             |
| 3 | DTF,<br>DTB | Test     | Halosulfuron-methyl       |  <p>The structure features a central benzothiazole ring system. One nitrogen atom of the benzothiazole is substituted with a methyl group (-CH<sub>3</sub>). The benzothiazole ring is connected via a sulfonamide group (-SO<sub>2</sub>NH-) to another nitrogen atom, which is part of a pyrimidine ring. The pyrimidine ring has two methoxy groups (-OCH<sub>3</sub>) at the 4 and 6 positions. Additionally, the benzothiazole ring has a chlorine atom (-Cl) and a methoxycarbonyl group (-COOCH<sub>3</sub>) attached to it.</p> |
| 4 | DTF,<br>DTB | Training | Kasugamycin               |  <p>The structure shows a complex molecule consisting of two pyranose rings linked by an oxygen atom. The left pyranose ring has hydroxyl groups (-OH) at the 2, 3, and 6 positions. The right pyranose ring has a methyl group (-CH<sub>3</sub>) at the 4-position and an amino group (-NH<sub>2</sub>) at the 2-position. The amino group is attached to a carbon atom that is also bonded to a carboxylic acid group (-COOH) and another amino group (-NH<sub>2</sub>).</p>                                                         |

---

5 DTF Training Mesotrione

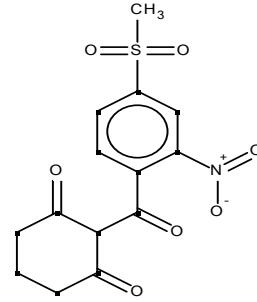

---

6 DTB Training Metsulfuron-methyl

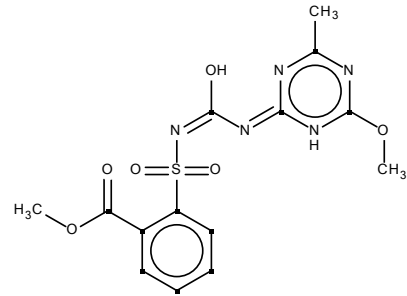

---

7 DTF Training Orthosulfamuron

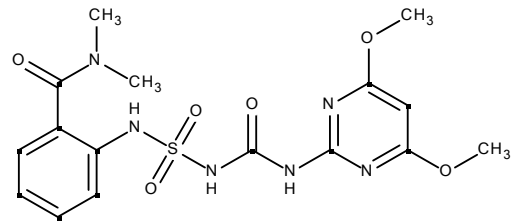

---

8 DTF Training Oxasulfuron

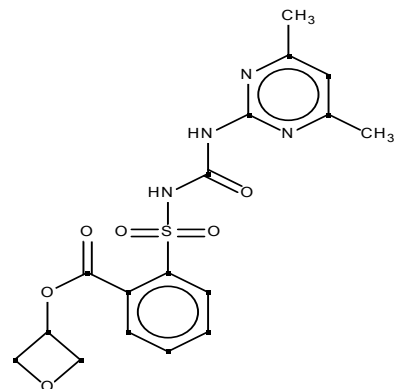

|    |          |          |                              |                                                                                      |
|----|----------|----------|------------------------------|--------------------------------------------------------------------------------------|
| 9  | DTF      | Training | Primisulfuron-methyl         | 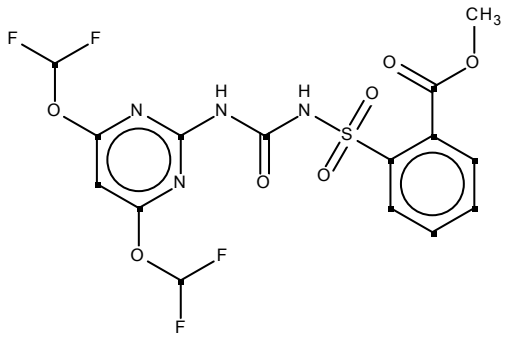   |
| 10 | DTF, DTB | Test     | Rimsulfuron                  |   |
| 11 | DTF, DTB | Training | Spinetoram (major component) |  |
| 12 | DTF, DTB | Training | Sulfosulfuron                |  |

---

13 DTF Training Tribenuron-methyl

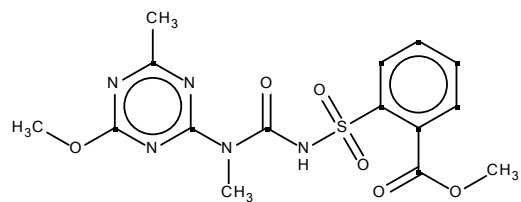

---

14 DTF, DTB Training Triflusulfuron-methyl

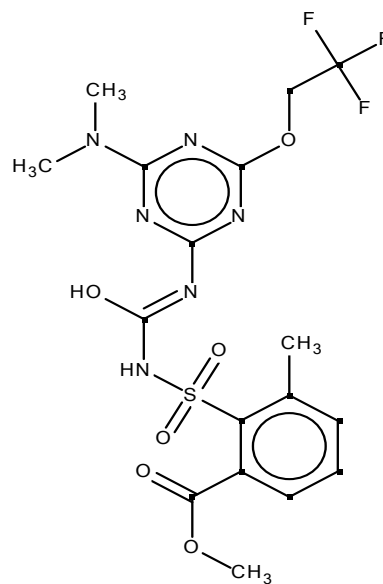

Supplement: TX-005-C6TX00083E-s001.pdf [file TX-005-C6TX00083E-s001.pdf]
